# Supplementary material for: Optimization of the NH2-UiO-66@MoS2 heterostructure for enhanced photocatalytic hydrogen evolution performance
Source: Royal Society of Chemistry journal article supplement (doi:10.1039/d3nj00676j), 2023-01-01
Supplement: d3nj00676j1.pdf [file d3nj00676j1.pdf]

## **Optimization of the NH<sub>2</sub>-UiO-66@MoS<sub>2</sub> Heterostructure for Enhanced Photocatalytic Hydrogen Evolution Performance**

Zenghuan Ren,<sup>b</sup> Xinghao Zhang,<sup>a</sup> Xiaofan Shi,<sup>a</sup> Di Yang,<sup>a</sup> Mei-Hui Yu,<sup>a</sup> Wenjun Zheng<sup>bc</sup> and Jijie Zhang<sup>\*a</sup>

<sup>a</sup> *School of Materials Science and Engineering, Tianjin Key Laboratory of Metal and Molecule-Based Material Chemistry, Nankai University, Tianjin 300350, China.*

<sup>b</sup> *Department of Chemistry, Key Laboratory of Advanced Energy Materials Chemistry (MOE), TKL of Metal and Molecule-based Materials Chemistry, College of Chemistry, Nankai University, Tianjin 300071, P. R. China.*

<sup>c</sup> *Collaborative Innovation Center of Chemical Science and Engineering (Tianjin), Nankai University, Tianjin 300071, P. R. China.*

<sup>\*</sup>Corresponding author. *E-mail address:* zhangjijie@nankai.edu.cn

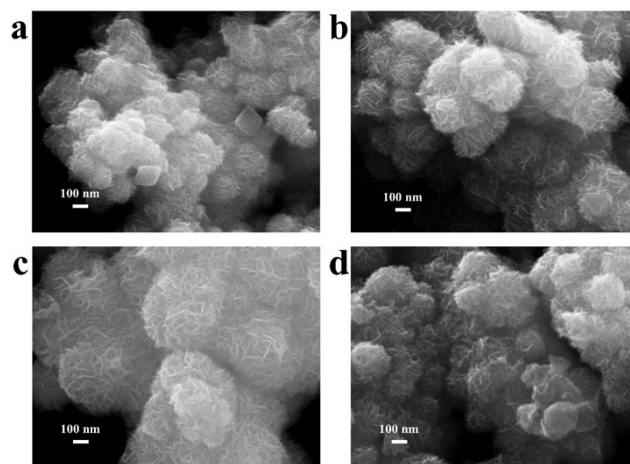

**Figure S1.** SEM images of (a) C-NUM-0.05; (b) C-NUM-0.1; (c) C-NUM-0.2 and (d) C-NUM-0.3.

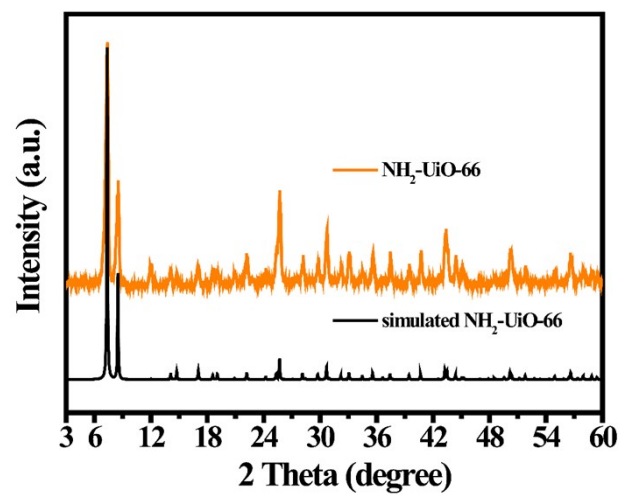

**Figure S2.** PXRD pattern of (a) NH<sub>2</sub>-UiO-66 and (b) simulated NH<sub>2</sub>-UiO-66.

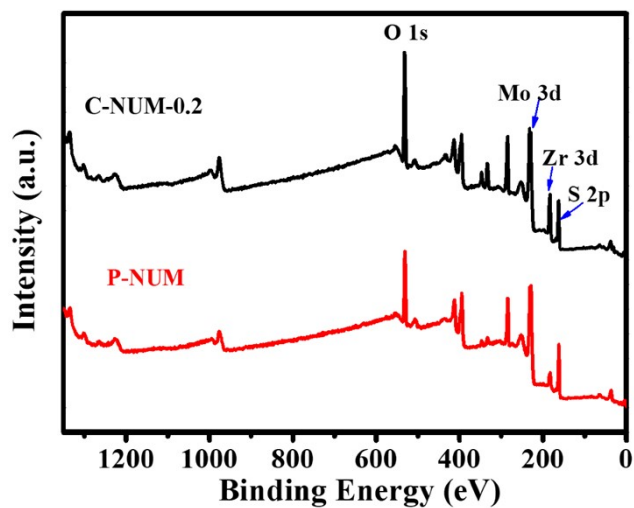

Fig. S3. Survey XPS spectra of C-NUM-0.2 and P-NUM

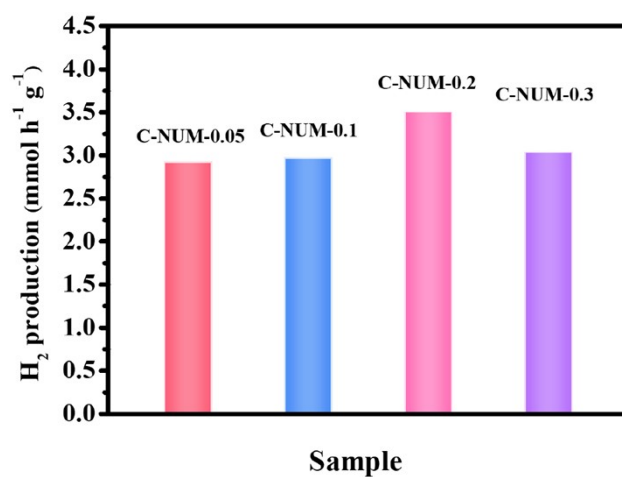

Figure S4. Hydrogen evolution performance of C-NUM-0.05; C-NUM-0.1; C-NUM-0.2 and C-NUM-0.3.

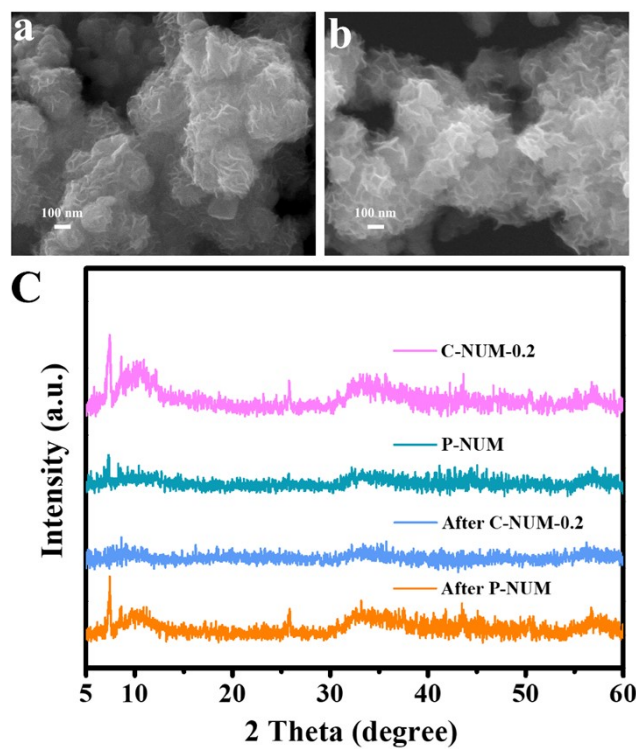

**Figure S5.** SEM image of (a) C-NUM-0.2 and (b) P-NUM after photocatalytic reaction; (c) PXRD pattern of C-NUM-0.2 and P-NUM before and after photocatalytic reaction.

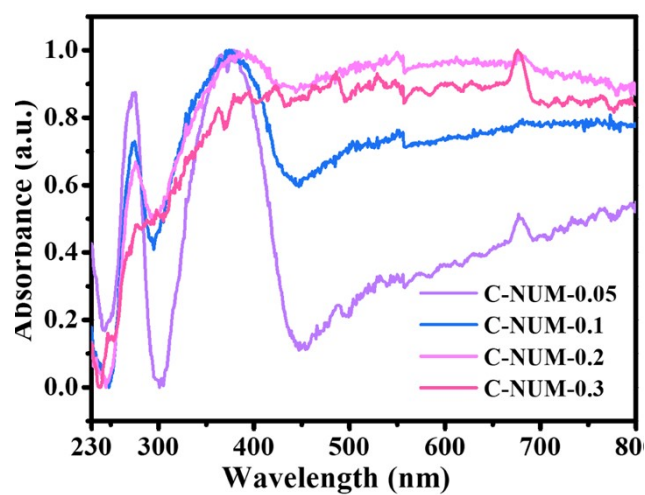

**Figure S6.** UV-vis spectra of C-NUM-0.05; C-NUM-0.1; C-NUM-0.2 and C-NUM-0.3.

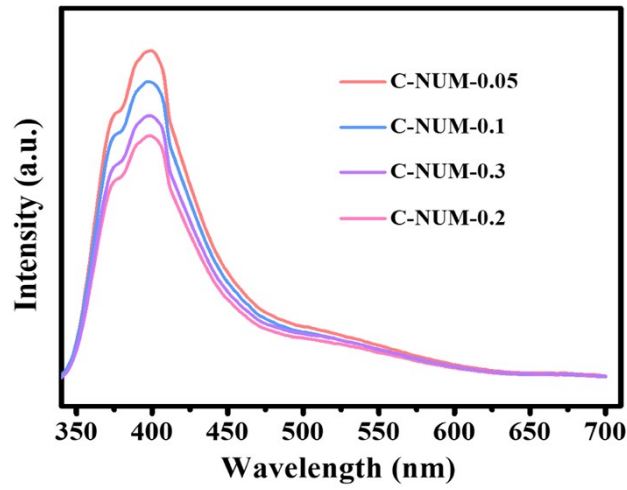

Figure S7. PL spectra of C-NUM-0.05; C-NUM-0.1; C-NUM-0.2 and C-NUM-0.3.

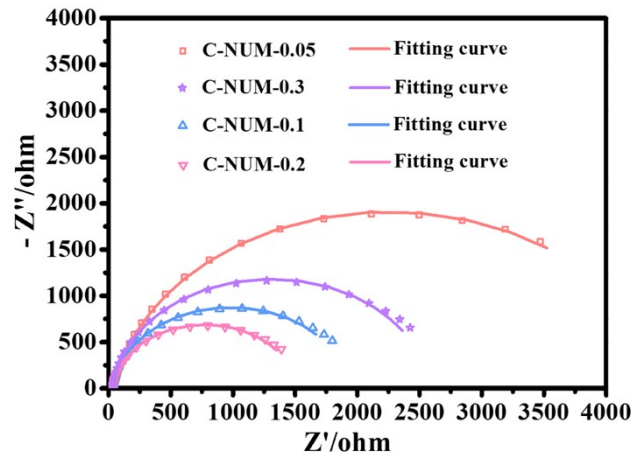

Figure S8. EIS plots of C-NUM-0.05; C-NUM-0.1; C-NUM-0.2 and C-NUM-0.3.

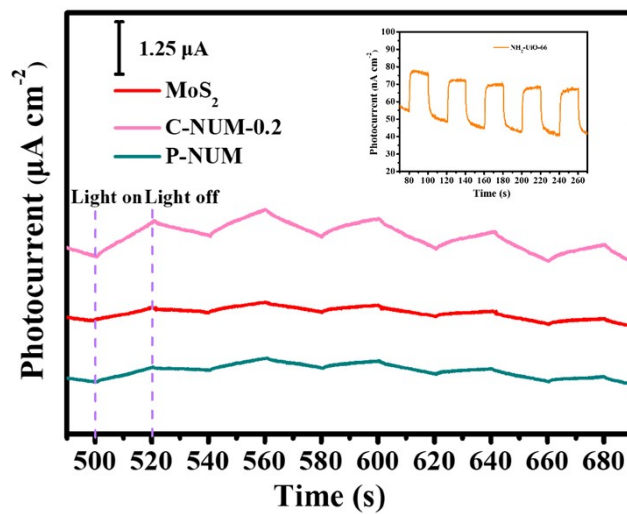

**Figure S9.** I-t curves of MoS<sub>2</sub>; C-NUM-0.2; P-NUM and NH<sub>2</sub>-UiO-66(inset).

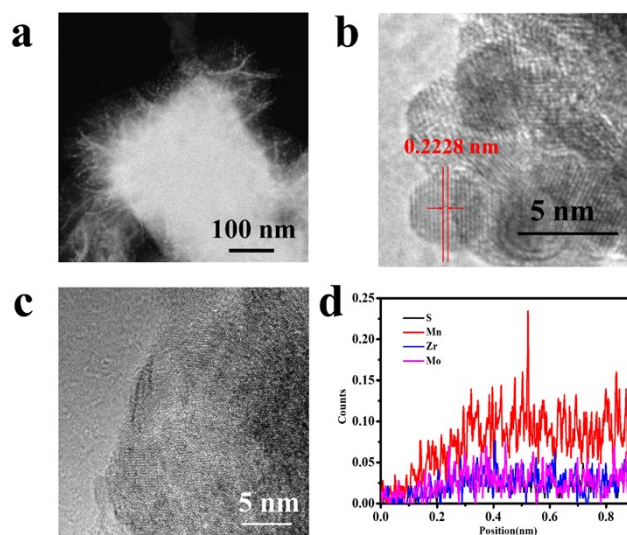

**Figure S10.** (a) TEM image of C-NUM-0.2/Pt, (b) HRTEM image of Pt nanoparticle, (c) TEM image of C-NUM-0.2/MnO<sub>x</sub>, (d) EDS line scan result of C-NUM-0.2/MnO<sub>x</sub>

**Table S1.** ICP-OES results for the contents of Zr and Mo.

| Samples    | Zr (wt %) | Mo (wt %) |
|------------|-----------|-----------|
| C-NUM-0.05 | 10.96     | 28.15     |
| C-NUM-0.1  | 6.70      | 34.36     |
| C-NUM-0.2  | 3.71      | 38.53     |
| P-NUM      | 3.91      | 38.01     |
| C-NUM-0.3  | 2.72      | 36.39     |

**Table S2. BJH results of NH<sub>2</sub>-UiO-66, MoS<sub>2</sub>, C-NUM-0.2 and P-NUM.**

| Samples                 | Adsorption (cm <sup>3</sup> /g) | Desorption (cm <sup>3</sup> /g) |
|-------------------------|---------------------------------|---------------------------------|
| NH <sub>2</sub> -UiO-66 | 0.080                           | 0.080                           |
| MoS <sub>2</sub>        | 0.144                           | 0.145                           |
| C-NUM-0.2               | 0.077                           | 0.077                           |
| P-NUM                   | 0.079                           | 0.081                           |

**Table S3. Similar reported photocatalyst**

| Sample                                                      | Test conditions                                                    | Light source  | H <sub>2</sub> production rate              | Ref.      |
|-------------------------------------------------------------|--------------------------------------------------------------------|---------------|---------------------------------------------|-----------|
| C-NUM-0.2                                                   | H <sub>2</sub> O/Na <sub>2</sub> S/Na <sub>2</sub> SO <sub>3</sub> | Full spectrum | 3.509 mmol g <sup>-1</sup> h <sup>-1</sup>  | This work |
| 1T-MoS <sub>2</sub> /HCN-4                                  | TEOA                                                               | AM1.5G        | 2724.2 mmol g <sup>-1</sup> h <sup>-1</sup> | [1]       |
| CN/MoS <sub>2</sub> -1                                      | TEOA                                                               | λ ≥ 400 nm    | 441.3 μmol g <sup>-1</sup> h <sup>-1</sup>  | [2]       |
| ac-MoS <sub>x</sub> /TiO <sub>2</sub>                       | Ethanol/H <sub>2</sub> O                                           | 365 nm LED    | 3.43 mmol h <sup>-1</sup> g <sup>-1</sup>   | [3]       |
| 1T-MoS <sub>2</sub> /MIL-125-NH <sub>2</sub>                | MeCN/TEA/H <sub>2</sub> O                                          | λ ≥ 420 nm    | 1454 μmol g <sup>-1</sup> h <sup>-1</sup>   | [4]       |
| MoS <sub>2</sub> -MoC@rGO/TiO <sub>2</sub>                  | CH <sub>3</sub> OH/H <sub>2</sub> O                                | UV light      | 575 μmol h <sup>-1</sup> g <sup>-1</sup>    | [5]       |
| MoS <sub>2</sub> /ZnO                                       | H <sub>2</sub> O/Na <sub>2</sub> S/Na <sub>2</sub> SO <sub>3</sub> | Visible light | 235 μmol g <sup>-1</sup> h <sup>-1</sup>    | [6]       |
| CdS/MoS <sub>2</sub>                                        | H <sub>2</sub> O/Na <sub>2</sub> S/Na <sub>2</sub> SO <sub>3</sub> | UV light      | 5587 μmol g <sup>-1</sup> h <sup>-1</sup>   | [7]       |
| g-C <sub>3</sub> N <sub>4</sub> -MoS <sub>2</sub> -ZnNi-ZIF | TEOA                                                               | λ ≥ 420 nm    | 77.8 μmol g <sup>-1</sup> h <sup>-1</sup>   | [8]       |

**Table S4.** Parameters of equivalent circuit for the impedance data of NH<sub>2</sub>-UiO-66, MoS<sub>2</sub>, C-NUM-0.2 and P-NUM.

| Samples                 | R <sub>1</sub> (Ω) | R <sub>2</sub> (Ω)   |
|-------------------------|--------------------|----------------------|
| NH <sub>2</sub> -UiO-66 | 42.94              | 1.27*10 <sup>7</sup> |
| MoS <sub>2</sub>        | 42.53              | 2456                 |
| C-NUM-0.2               | 35.27              | 1479                 |
| P-NUM                   | 42.85              | 2343                 |

**Table S5.** Parameters of equivalent circuit for the impedance data of C-NUM-0.05; C-NUM-0.1; C-NUM-0.2 and C-NUM-0.3

| Samples    | R <sub>1</sub> (Ω) | R <sub>2</sub> (Ω) |
|------------|--------------------|--------------------|
| C-NUM-0.05 | 42.68              | 4434               |
| C-NUM-0.1  | 35.29              | 1897               |
| C-NUM-0.2  | 35.27              | 1479               |
| C-NUM-0.3  | 38.63              | 2538               |

## Reference

- [1] Y. Xiong, T. Liu, W. Liu, X. Wang, Y. Xue and J. Tian, *Int. J. Hydrogen Energy*, 2023, **48**, 7284-7293.
- [2] Y. Xu, J. Ouyang, L. Zhang, H. Long, Y. Song and Y. Cui, *Chem. Phys. Lett.*, 2023, **814**, 140331.
- [3] L. Li, D. Gao, F. Chen, X. Wang and H. Yu, *Appl. Surf. Sci.*, 2023, **608**, 155173.



- [4] T. Nguyen, S. Kampouri, B. Valizadeh, W. Luo, D. Ongari, O. Planes, A. Zuttel, B. Smit and K. Stylianou, *ACS Appl. Mater. Interfaces*, 2018, **10**, 30035-30039.
- [5] M. Pan, L. Gao, P. Wang, X. Wang and H. Yu, *J. Alloys Compd.*, 2023, **939**, 168721.
- [6] Y. Hunge, A. Yadav, S. Kang, S. Jun Lim and H. Kim, *J. Photochem. Photobiol., A*, 2023, **434**, 114250.
- [7] L. Lin, S. Huang, Y. Zhu, B. Du, Z. Zhang, C. Chen, X. Wang and N. Zhang, *Dalton Trans.*, 2019, **48**, 2715-2721.
- [8] N. Arif, Y. Z. Lin, K. Wang, Y. Dou, Y. Zhang, K. Li, S. Liu and F. T. Liu, *RSC Adv.*, 2021, **11**, 9048-9056.
